# Supplementary material for: Missense variants in homeobox domain of PBX1 cause coracoclavicular ankylosis
Source: Research Square preprint supplement (doi:10.21203/rs.3.rs-5211072/v1), 2024-10-23
Supplement: Supplementary file 1 [file 0bcbee03669ec9e026fa8780.pdf]

## **SUPPLEMENTARY MATERIALS**

Missense variants in homeobox domain of PBX1 cause coracoclavicular ankylosis

Maki Iwai<sup>1, 11</sup>, Kyra E. Stuurman<sup>2, 11</sup>, Kirsten Meagher<sup>3</sup>, Lise A. Leveille<sup>4</sup>, Takashi Saisu<sup>5</sup>, Satomi Mori<sup>6</sup>, Tatsuro Kumaki<sup>1</sup>, Yumi Enomoto<sup>7</sup>, Noriko Aida<sup>8</sup>, Hisato Suzuki<sup>9</sup>, Toshiki Takenouchi<sup>9</sup>, Kenjiro Kosaki<sup>9</sup>, Millan S. Patel<sup>3</sup>, Kenji Kurosawa<sup>1\*</sup>, Gen Nishimura<sup>10</sup>

<sup>1</sup>Division of Medical Genetics, Kanagawa Children's Medical Center, Yokohama, Japan

<sup>2</sup>Department of Clinical Genetics, Erasmus MC, University Medical Center Rotterdam, Rotterdam, the Netherlands

<sup>3</sup>Department of Medical Genetics, University of British Columbia, Vancouver, BC, Canada

<sup>4</sup>Department of Orthopaedic Surgery, British Columbia Children's Hospital, University of British Columbia, Vancouver, BC, Canada

<sup>5</sup>Department of Pediatric Orthopaedics, Chiba Child & Adult Orthopaedic Clinic, Chiba, Japan.

<sup>6</sup>Department of General Medicine, Kanagawa Children's Medical Center, Yokohama, Japan

<sup>7</sup>Clinical Research Institute, Kanagawa Children's Medical Center, Yokohama, Japan

<sup>8</sup>Department of Radiology, Kanagawa Children's Medical Center, Yokohama, Japan

<sup>9</sup>Center for Medical Genetics, Keio University School of Medicine, Tokyo, Japan

<sup>10</sup>Department of Radiology, Musashino-Yowakai Hospital, Tokyo, Japan

<sup>11</sup>These authors contributed equally: Maki Iwai, Kyra E. Stuurman

Corresponding:

Kenji Kurosawa

Division of Medical Genetics, Kanagawa Children's Medical Center, Yokohama, Japan  
2-138-4 Mutsukawa, Minami-ku, Yokohama 232-8555, Japan

Phone: +81-45-711-2351, Fax: +81-45-742-7821

E-mail: kurosawa-k@ncchd.go.jp

## Clinical reports

### Patient 1. (University of British Columbia, Vancouver, BC, Canada)

The proband was a 5-month-old male patient. Apart from clomiphene citrate use, the pregnancy was unremarkable with no teratogenic exposures. Delivery was by Caesarean section at 41 weeks 4 days gestation due to fetal deceleration. Apgar scores were 2 at 1 minute and 7 at 5 minutes with meconium aspiration and positive pressure ventilation required initially. Birth weight, length and head circumference plotted on the 50<sup>th</sup> centile. He was discharged home on day 14 of life. An inguinal hernia was noted at 2 months and respiratory arrest occurred around that time. During the work up for this, laryngomalacia with normal vocal cord movement, persistent hoarse voice, gastroesophageal reflux disease, failure to thrive, hyperextensible joints and patent ductus arteriosus (PDA) were noted. PDA was treated by coiling. He was prescribed a hip brace at night for his acetabular dysplasia. Parents were healthy, nonconsanguineous and of Punjabi Indian origin. A maternal uncle had 2 healthy children and 1 daughter with intellectual disability, very little speech at age 7 and no obvious dysmorphism. The family history was otherwise unremarkable.

The boy was seen again at age 4 years 8 months. He had been diagnosed with autism spectrum disorder the year before and had recently had bilateral orchidopexy for markedly hyper-retractile testes. He had advanced dental caries and required placement of 15 crowns under anesthesia. He continued to have diffuse joint laxity, but his voice had normalized. He had mild bilateral ptosis on ophthalmologic exam. He had global developmental delay with walking at age 2, using utensils at age 3 and no toilet training or speech besides grunting vocalizations. His receptive speech was better, and he could follow 2 step commands. Height was 101.7 cm (3<sup>rd</sup> to 15<sup>th</sup> centile), weight was 14 kg (3<sup>rd</sup> to 15<sup>th</sup> centile) and head circumference was 50.5 cm (15<sup>th</sup> to 50<sup>th</sup> centile). The head shape was mildly triangular with parietal bossing and there were sparse medial eyebrows. The nose was prominent and tubular with a mild fusiform shape and upturned tip. The philtrum was mostly smooth, grade 4/5. The ears were prominent with simple helices and a scalloped tragus on the right. The upper back was rounded in two dimensions and there was a mild upper thoracic dextroscoliosis. Borderline wide-spaced nipples were present. No hepatosplenomegaly was present. Moderate to severe joint laxity was noted. Hands showed a right simian crease, and an extra palmar crease was seen on the right, above the usual lateral transverse crease. Palmar creases were deep. Tapered fingers and mildly small finger and toenails were present.

Investigations including chromosome microarray, Fragile X, brain MRI, abdominal ultrasound, audiology, newborn screening, ammonia, lactate, calcium, phosphorus, 25-hydroxy vitamin, acylcarnitine profile, transferrin isoelectric focusing, mucopolysaccharides in urine, urine organic acids, urine purines and pyrimidines, and plasma amino acids were normal. PTH was mildly elevated at 8.9 pmol/L (normal range 1.5-7.6 pmol/L).

X-rays at 3 months showed a calcified cephalohematoma overlying the left parietal bone. Normal vertebral bodies and intervertebral disc spaces were present. There was expansion and deformity of the lateral aspect of the clavicles, bilateral vertical orientation of the coracoid processes, marked thickening and advanced ossification of the ischiopubic rami and mildly dysplastic acetabuli.

MRI of the shoulders showed they had a dysplastic appearance, encompassing excessive scapular anteversion, flared and foreshortened distal clavicles and high-riding humeral heads with mild posterior subluxation. Mild glenoid retroversion was seen, 3 to 5 degrees on the left and 8 to 10 degrees on the right.

Clinical exome sequencing at Blueprint Genetics in 2019 showed 3 variants of uncertain significance, NM\_002585.4:c.844A>G, p.Asn282Asp in *PBX1*, c.407G>A, p.Ser136Asn (maternally inherited) in *SMARCA2* and c.171\_180del, p.Lys57Asnfs\*17 in *KLHDC10* (all hg19). None of the variants were found in gnomAD and all were expected to be damaging. Since *KLHDC10* was not associated with a known OMIM phenotype and the boy's phenotype did not match with Nicolaides-Baraitser syndrome, but *PBX1* was known to be associated with developmental delay, it was concluded this was the most likely disease-causing variant.

X-rays were circulated through the International Skeletal Dysplasia listserv and no diagnosis was obtained, although one of us (G.N.) recalled Patient 1 from his files and recognized the radiologic similarities between the two patients. One of us (G.N.) was later consulted on Patient 3 and recognized it as a third case.

**Patient 2. (Chiba Child & Adult Orthopaedic Clinic, Chiba, Japan. Supplementary Figure 1A, B)**

The patient was a 7-year-old girl. She was born to nonconsanguineous parents after uneventful pregnancy. Her birth weight was 2932 g (-0.2 SD). Apgar scores were 7 at 1 min and 8 at 5 minutes, respectively. Soon after birth, she was transferred to NICU for severe respiratory failure and requiring mechanical ventilation. She developed cardiac failure due to PDA and underwent ligation procedure. She was discharged at the age of one year and two months. Her developmental milestones were delayed, attained head control at 6 months,

rolling over at 8 months, walking alone at two years. Her shoulder exhibited unique shape, with both clavicles showing thick and short, representing projective scapulae.

Whole exome sequencing was performed using a SureSelect Human All Exon V5 + UTRs Kit (Agilent Technologies), followed by 101-bp paired-end sequencing on a HiSeq 2500 (Illumina), according to the manufacturers' instructions. Sequencing data were analyzed with the Burrows-Wheeler Alignment SAMTools, Picard, the Genome Analysis Toolkit, and SnpEff for variant annotation. Copy number variation analysis was performed using the log2-ratio of read depth on each exon as described previously (Enomoto et al., 2022). We identified a novel variant, c.850T>A, p.(Phe284Ile) in *PBX1* (NM\_002585.4). Sanger sequencing confirmed that the variant was de novo. The variant is not included in the public databases gnomAD, jMorp, ClinVar, Human Genetic Variation Database, or the Human Genome Mutation Database 2022.3. The highest CADD (Combined Annotation Dependent Depletion) score was 26.0. The variant is classified as likely pathogenic according to the American College of Medical Genetics and Genomics standards and guidelines for the interpretation of sequence variants (PS2, PM2, PP3, PP4) (Richards et al., 2015). No other variant or CNV that could be associated with her condition was detected in this study.

**Patient 3. (Kanagawa Children's Medical Center, Yokohama, Japan. Supplementary Figure 1C, D)**

The proband was a 4-year-old female patient. The pregnancy was complicated with increased nuchal translucency from the first trimester. Amniocentesis revealed a normal female karyotype. At 30 weeks of gestation, the stomach bubble was not visible, and polyhydramnios was noted, suggesting possible esophageal atresia. She was born at 34 weeks and 5 days of gestation to a 27-year-old mother via cesarean section due to non-reassuring fetal status. Her birth weight and length were 1982 g (-0.7 SD) and 43.5 cm (-0.6 SD), respectively. After birth, she had respiratory distress requiring surfactant therapy followed by mechanical respiratory support. She showed hypoplastic thoracic cage and laryngomalacia but no esophageal atresia. Echocardiography showed left ventricular heart failure, patent ductus arteriosus (PDA), pulmonary hypertension, persistent left superior vena cava (PLSVC), and patent foramen ovale (PFO). PDA was surgically ligated at twenty days. Because of recurrent acute respiratory failure episodes, she underwent tracheostomy and supported by a mechanical ventilator after the age of two years. Her developmental milestones were severely delayed. She was able to stand with support at age three but unable to walk by four years without support. She had severe feeding difficulty and underwent gastrostomy from the age of four. Ultrasonography revealed a large gallstone

but standard shape and size in the renal pelvis and calyces of bilateral kidneys. Her dysmorphic features included a cleft soft palate, auricular hypoplasia, and hypoplastic nipples. Ophthalmologic investigation revealed choroid plexus cyst and glaucoma. Her thorax and shoulders were slim. She presented hunchback posture when she was sitting. Her scapula was anterior rotated and lateral displacement. Her hip joint was flexion and medial displacement.

A systematic bone survey during the neonatal period revealed skeletal dysplasia, including a fusion (ankylosis) between the clavicle and coracoid process of the scapula, premature closure of the ischiopubic synchondrosis and broad ischia, and mandible-like hyoid arch. She showed facial dysmorphism including arched eyebrows, hypertelorism, epicanthus, bulbous nose, prominent Cupid's bow, and prominent antihelix of the ears. She also had sloping shoulders, as did patient 2. No finger deformities were observed.

Clinical information was collected after obtaining written informed consent from the patient's family. This study was approved by the institutional review board of Kanagawa Children's Medical Center. According to the manufacturer's instructions, genomic DNA was extracted from the patient's peripheral blood and both parents using a QIAcube kit (QIAGEN, Hilden, Germany). Whole exome sequencing was performed for both the affected patient and her parents. Genomic DNA captured by Agilent SureSelect Human All Exon V6 (Agilent Technologies, Santa Clara, CA) was sequenced on a HiSeq2500 (Illumina, Inc. San Diego, CA) with 151-base pair paired-end reads. We identified a heterozygous variant NM\_002585.4:c.869G>T: p.(Arg290Leu) (hg19) of *PBX1*. Sanger sequencing confirmed that the variant was a de novo event.

**Supplementary Figure**

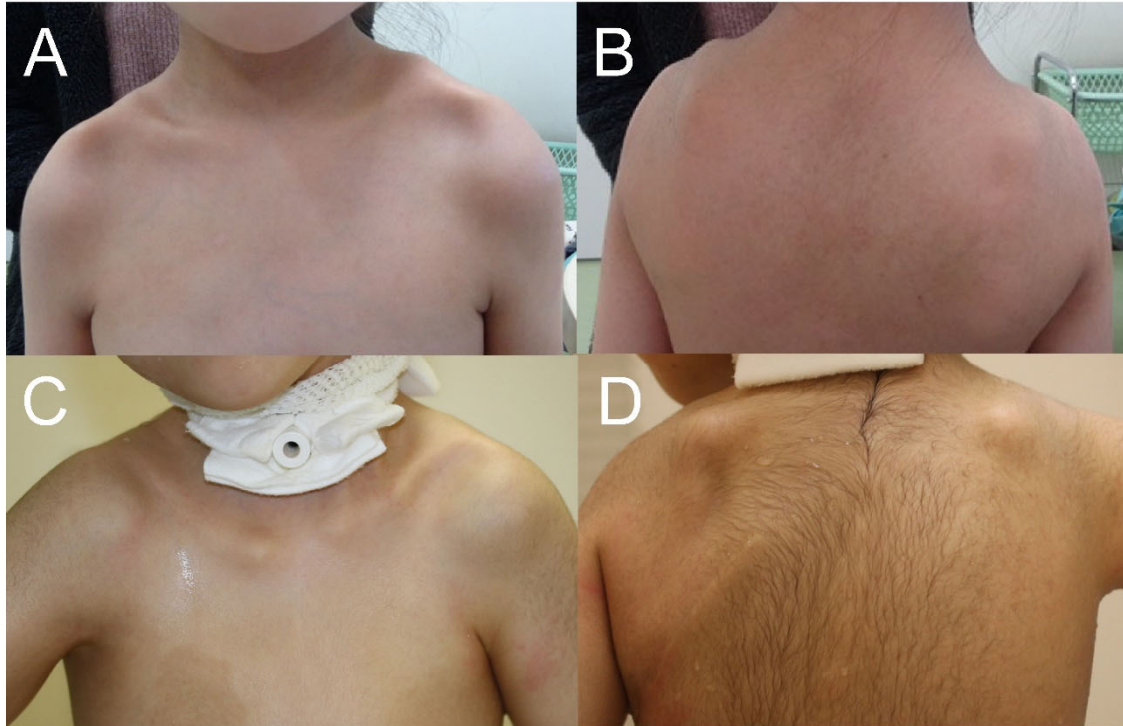

**Supplementary Figure 1.** Patient 2 (A, B) at age 7 years and patient 3 (C, D) at age 6 years. The clavicle was thickened and shortened. The scapula was pulled anteriorly and displaced by the fusion of the coracoid process of the scapula and the coracoid tubercle of the clavicle, or coracoclavicular ankylosis (A, B, C, D).

**Supplementary Table 1. Genetic and clinical features of the present patients and the previously reported cases with a missense variant in homeobox domain of PBX1**

|                                                                 | Present study                                                                |                                          |                                                                        | Ruscitt et al. (2022)                                                                          |
|-----------------------------------------------------------------|------------------------------------------------------------------------------|------------------------------------------|------------------------------------------------------------------------|------------------------------------------------------------------------------------------------|
|                                                                 | Patient 1                                                                    | Patient 2                                | Patient 3                                                              |                                                                                                |
| Variant (NM_002585.4)                                           | c.844A>G                                                                     | c.850T>A                                 | c.869G>T                                                               | c.868C>T                                                                                       |
| Protein change (NP_002576.1)                                    | p.Asn282Asp                                                                  | p.Phe284Ile                              | p.Arg290Leu                                                            | p.Arg290Trp                                                                                    |
| Genome position (GRCh38:NC_000001.11)                           | g.164811996A>G                                                               | g.164812002T>A                           | g.164812021G>T                                                         | g.164812020C>T                                                                                 |
| CADD (v1.6)                                                     | 27.6                                                                         | 26                                       | 31                                                                     | 29                                                                                             |
| REVEL                                                           | 0.937                                                                        | 0.984                                    | 0.961                                                                  | 0.867                                                                                          |
| ACMG variant classification                                     | PS1+PM1+PM2+PP3+PP4<br>Likely pathogenic                                     | PS1+PM1+PM2+PP3+PP4<br>Likely pathogenic | PS2+PM1+PM2+PM5+PP3+PP4+P5<br>Pathogenic                               | PS2+PM1+PM2+PP3+PP4+PP5<br>Likely pathogenic                                                   |
| Sex                                                             | Male                                                                         | Female                                   | Female                                                                 | Male                                                                                           |
| Age at latest investigation                                     | 7                                                                            | 7                                        | 6                                                                      | Day 4                                                                                          |
| Craniofacial characteristics                                    |                                                                              |                                          |                                                                        |                                                                                                |
| Eye abnormality                                                 | Ptosis                                                                       | -                                        | Choroid plexus cyst, glaucoma                                          | -                                                                                              |
| Cleft palate                                                    | -                                                                            | -                                        | Cleft soft palate                                                      | -                                                                                              |
| Ear anomaly                                                     | Simple helices and scalloped tragus on the right                             | -                                        | Prominent inferior crus of antihelix                                   | Low-set posterior ly rotated ears                                                              |
| Facial dysmorphisms                                             | Sparse medial eyebrows, upturned nares, smooth philtrum                      | -                                        | Mask-like face                                                         | Micrognathia                                                                                   |
| Cardiopulmonary                                                 |                                                                              |                                          |                                                                        |                                                                                                |
|                                                                 | Meconium aspiration requiring ventilation                                    | Respiratory failure                      | Pulmonary hypoplasia, peristent pulmonary hypertension of the newborn. | Pulmonary hypertension and total anomalous pulmonary venous return, and pulmonary dysmorphisms |
| Patent ductus arteriosus (PDA)                                  | +                                                                            | +                                        | +                                                                      | +                                                                                              |
| Laryngomalasia/tracheomalasia                                   | +                                                                            | +                                        | +                                                                      | NA                                                                                             |
| CAKUT                                                           |                                                                              |                                          |                                                                        |                                                                                                |
| Renal hypoplasia/dysplasia                                      | -                                                                            | -                                        | -                                                                      | Double renal pelvis with double ureter on the right side                                       |
| Genital anomaly                                                 | -                                                                            | -                                        | -                                                                      | -                                                                                              |
| Skeletal                                                        |                                                                              |                                          |                                                                        |                                                                                                |
| Coracoclavicular ankylosis                                      | +                                                                            | +                                        | +                                                                      | NA                                                                                             |
| Thick clavicles                                                 | +                                                                            | +                                        | +                                                                      | Cleidosternal dysostosis                                                                       |
| Premature ossification or absence of the ischiopubic synchrosis | +                                                                            | +                                        | +                                                                      | NA                                                                                             |
| Hip dislocation/subluxation                                     | -                                                                            | -                                        | -                                                                      | NA                                                                                             |
| Lumber lordosis                                                 | -                                                                            | -                                        | -                                                                      | -                                                                                              |
| Spina bifida                                                    | -                                                                            | -                                        | -                                                                      | NA                                                                                             |
| Rib abnormalities                                               | -                                                                            | -                                        | -                                                                      | NA                                                                                             |
| Other skeletal anomalies                                        | -                                                                            | -                                        | -                                                                      | -                                                                                              |
| Skin                                                            | -                                                                            | -                                        | Hypoplastic nipples                                                    | -                                                                                              |
| Deafness                                                        | -                                                                            | -                                        | +                                                                      | NA                                                                                             |
| Neurodevelopment                                                | Autism spectrum disorder, global developmental delay with walking at 2 years | Mild developmental delay                 | Severely delayed, walking at 5 years, autism spectrum disorder         | NA                                                                                             |
| Brain MRI                                                       | Normal                                                                       | NA                                       | Hypoplastic corpus callosum                                            | -                                                                                              |
| Gastrointestinal                                                | Gastroesophageal reflux                                                      | -                                        | Gastrostomy due to feeding difficulty                                  | Hepatomegaly, colonic duplication and malrotation of the appendix                              |
| Joint laxity                                                    | +                                                                            | +                                        | +                                                                      | NA                                                                                             |
| Other                                                           |                                                                              |                                          | Polyhydramnios                                                         | Polyhydramnios                                                                                 |

**Supplementary Table 1. Genetic and clinical features of the present patients and the previously reported cases with a missense variant in homeobox domain of PBX1 (Continued)**

| Kammoun et al.<br>(2018)                 | Slavotinek et al.2017                                                                |                                                                                        |                                                             | Eozenou et al.<br>(2019)                  | Bartolli-Avella et al.<br>(2021)                                                                                                                                     |
|------------------------------------------|--------------------------------------------------------------------------------------|----------------------------------------------------------------------------------------|-------------------------------------------------------------|-------------------------------------------|----------------------------------------------------------------------------------------------------------------------------------------------------------------------|
|                                          | Patient 4                                                                            | Patient 5                                                                              | Patient 8                                                   |                                           |                                                                                                                                                                      |
| c.700C>T                                 | c.701G>C                                                                             | c.704G>A                                                                               | c.704G>C                                                    | c.704G>T                                  | c.836A>G                                                                                                                                                             |
| p.Arg234Trp                              | p.Arg234Pro                                                                          | p.Arg235Gln                                                                            | p.Arg235Gln                                                 | p.Arg235Gln                               | p.Gln279Arg                                                                                                                                                          |
| g.164799888C>T                           | g.164799889G>C                                                                       | g.164807544G>A                                                                         | g.164807544G>C                                              | g.164807544G>T                            | g.164807676A>G                                                                                                                                                       |
| 25.2                                     | 34                                                                                   | 33                                                                                     | 31                                                          | 31                                        | 32                                                                                                                                                                   |
| 0.751                                    | 0.925                                                                                | 0.854                                                                                  | 0.868                                                       | 0.899                                     | 0.953                                                                                                                                                                |
| PS2+PM1+PM2+PP3+PP4<br>Likely pathogenic | PS2+PS3+PM1+PM2+<br>PP3+PP4<br>Pathogenic                                            | PS2+PS3+PM1+PM2+P<br>P3+PP4<br>Pathogenic                                              | PS2+PS3+PM1+PM2+P<br>P3+PP4<br>Pathogenic                   | PS2+PS3+PM1+PM2+P<br>P3+PP4<br>Pathogenic | PS2+PM1+PM2+PP3+P<br>P4<br>Likely pathogenic                                                                                                                         |
| NA                                       | Female                                                                               | Male                                                                                   | Female (46,XY)                                              | Female (46,XY)                            | Male                                                                                                                                                                 |
| NA                                       | 2                                                                                    | 22 M                                                                                   | 3 M                                                         | 12.3                                      | NA                                                                                                                                                                   |
|                                          |                                                                                      |                                                                                        |                                                             |                                           |                                                                                                                                                                      |
| NA                                       | -                                                                                    | -                                                                                      | -                                                           | -                                         | -                                                                                                                                                                    |
| NA                                       | -                                                                                    | -                                                                                      | -                                                           | -                                         | -                                                                                                                                                                    |
| NA                                       | -                                                                                    | Microtia with prominent<br>lobules                                                     | -                                                           | -                                         |                                                                                                                                                                      |
| NA                                       | -                                                                                    | Prominent nuchal folds,<br>micrognathia                                                | -                                                           | -                                         | Dolicocephaly, narrow<br>forehead, prominent<br>nose, deeply set eye,<br>highly arched eyebrow                                                                       |
|                                          |                                                                                      |                                                                                        |                                                             |                                           |                                                                                                                                                                      |
| NA                                       | Perinatal asphyxia with<br>chronic lung disease,<br>pulmonary artery<br>hypertension | Lung hypoplasia,<br>paralyzed right<br>diaphragm, persistent<br>pulmonary hypertension | Respiratory insufficiency<br>with hypercapnia               | -                                         | Atrial septal defect,<br>coarctation of aorta,<br>neonatal respiratory<br>distress, Recurrent<br>upper respiratory tract<br>infections, pulmonary<br>artery stenosis |
| NA                                       | +                                                                                    | +                                                                                      | -                                                           | -                                         | +                                                                                                                                                                    |
| NA                                       | -                                                                                    | NA                                                                                     | -                                                           | -                                         | -                                                                                                                                                                    |
|                                          |                                                                                      |                                                                                        |                                                             |                                           |                                                                                                                                                                      |
| NA                                       | -<br>(Pyelocaliectasia +)                                                            | -                                                                                      | -                                                           | -                                         |                                                                                                                                                                      |
| NA                                       | -                                                                                    | -                                                                                      | 46,XY gonadal<br>dysgenesis                                 | 46,XY gonadal<br>dysgenesis               | Cryptorchidism                                                                                                                                                       |
|                                          |                                                                                      |                                                                                        |                                                             |                                           |                                                                                                                                                                      |
| NA                                       | -                                                                                    | -                                                                                      | -                                                           | -                                         | NA                                                                                                                                                                   |
| NA                                       | -                                                                                    | -                                                                                      | -                                                           | -                                         | NA                                                                                                                                                                   |
| NA                                       | -                                                                                    | -                                                                                      | -                                                           | -                                         | NA                                                                                                                                                                   |
| NA                                       | -                                                                                    | -                                                                                      | -                                                           | -                                         | NA                                                                                                                                                                   |
| NA                                       | -                                                                                    | -                                                                                      | -                                                           | -                                         | NA                                                                                                                                                                   |
| NA                                       | -                                                                                    | -                                                                                      | -                                                           | -                                         | NA                                                                                                                                                                   |
| NA                                       | -                                                                                    | -                                                                                      | -                                                           | Radiocubital synostosis                   | Barrel-shaped chest                                                                                                                                                  |
| NA                                       | -                                                                                    | -                                                                                      | -                                                           | -                                         | -                                                                                                                                                                    |
| NA                                       | -                                                                                    | -                                                                                      | -                                                           | -                                         | -                                                                                                                                                                    |
| NA                                       | Global developmental<br>delay, walking with<br>assistance at 2 years                 | -                                                                                      | -                                                           | -                                         | Muscle hypotonia,<br>hyperreflexia, delay<br>gross motor<br>development                                                                                              |
| NA                                       | NA                                                                                   | NA                                                                                     | NA                                                          | NA                                        | NA                                                                                                                                                                   |
| NA                                       | Gastrostomy due to<br>gastrointestinal reflux                                        | -                                                                                      | Difficulty with oral intake<br>and requires tube<br>feeding | NA                                        | Achalasia, esophageal<br>stenosis                                                                                                                                    |
| NA                                       | -                                                                                    | -                                                                                      | -                                                           | -                                         | +                                                                                                                                                                    |
| Diaphragmatic hernia                     | Polyhydramnios                                                                       |                                                                                        | Polyhydramnios,<br>inguinal hernia                          |                                           | NA                                                                                                                                                                   |



**Supplementary Table 2.** Reported variants and the references cited in Figure 2.

| Variant (NM_002585.4) | Protein change (NP_002576.1) | References                                                                                                                                                                                                                                                                                                          |
|-----------------------|------------------------------|---------------------------------------------------------------------------------------------------------------------------------------------------------------------------------------------------------------------------------------------------------------------------------------------------------------------|
| c.145C>T              | p.Gln49*                     | Tran Mau-Them F, Moutton S, Racine C, Vitobello A, Bruel AL, Nambot S, et al. Second-tier trio exome sequencing after negative solo clinical exome sequencing: an efficient strategy to increase diagnostic yield and decipher molecular bases in undiagnosed developmental disorders. Hum Genet. 2020;139:1381-90. |
| c.234del              | p.Phe78Leufs*                | Li J, Wang L, Yu P, Shi L, Zhang K, Sun ZS, et al. Vitamin D-related genes are subjected to significant de novo mutation burdens in autism spectrum disorder. Am J Med Genet B Neuropsychiatr Genet. 2017;174:568-77.                                                                                               |
| c.263C>T              | p.Thr88Ile                   | Fromer M, Pocklington AJ, Kavanagh DH, Williams HJ, Dwyer S, Gormley P, et al. De novo mutations in schizophrenia implicate synaptic networks. Nature. 2014 ;506(7487):179-84.                                                                                                                                      |
| c.319C>T              | p.Arg107Try                  | Arts P, Garland J, Byrne AB, Hardy TSE, Babic M, Feng J, et al. Paternal mosaicism for a novel PBX1 mutation associated with recurrent perinatal death: Phenotypic expansion of the PBX1-related syndrome. Am J Med Genet A. 2020;182:1273-7.                                                                       |
| c.320G>C              | p.Arg107Pro                  | Pode-Shakked B, Barel O, Singer A, Regev M, Poran H, Eliyahu A, et al. A single center experience with publicly funded clinical exome sequencing for neurodevelopmental disorders or multiple congenital anomalies. Sci Rep. 2021;11:19099.                                                                         |
| c.400dup              | p.Ala134Glyfs*               | Safgren SL, Olson RJ, Pinto E Vairo F, Bothun ED, Hanna C, Klee EW, et al. De novo PBX1 variant in a patient with glaucoma, kidney anomalies, and developmental delay: An expansion of the CAKUTED phenotype. Am J Med Genet A. 2022;188:919-25.                                                                    |

|                     |                |                                                                                                                                                                                                                                                                                                                                             |
|---------------------|----------------|---------------------------------------------------------------------------------------------------------------------------------------------------------------------------------------------------------------------------------------------------------------------------------------------------------------------------------------------|
| c.413_419delGGGCAGG | p.Gly138Valfs* | Riedhammer KM, Siegel C, Alhaddad B, Montoya C, Kovacs-Nagy R, Wagner M, et al. Identification of a Novel Heterozygous <i>De Novo</i> 7-bp Frameshift Deletion in <i>PBX1</i> by Whole-Exome Sequencing Causing a Multi-Organ Syndrome Including Bilateral Dysplastic Kidneys and Hypoplastic Clavicles. <i>Front Pediatr</i> . 2017;5:251. |
| c.428delA           | p.Asn143Thrfs* | Heidet L, Morinière V, Henry C, De Tomasi L, Reilly ML, Humbert C, et al. Targeted Exome Sequencing Identifies <i>PBX1</i> as Involved in Monogenic Congenital Anomalies of the Kidney and Urinary Tract. <i>J Am Soc Nephrol</i> . 2017;28:2901-14.                                                                                        |
| c.511-2A>G          |                | Heidet L, Morinière V, Henry C, De Tomasi L, Reilly ML, Humbert C, et al. Targeted Exome Sequencing Identifies <i>PBX1</i> as Involved in Monogenic Congenital Anomalies of the Kidney and Urinary Tract. <i>J Am Soc Nephrol</i> . 2017;28:2901-14.                                                                                        |
| c.550C>T            | p.Arg184*      | Heidet L, Morinière V, Henry C, De Tomasi L, Reilly ML, Humbert C, et al. Targeted Exome Sequencing Identifies <i>PBX1</i> as Involved in Monogenic Congenital Anomalies of the Kidney and Urinary Tract. <i>J Am Soc Nephrol</i> . 2017;28:2901-14.                                                                                        |
| c.551G>C            | p.Arg184Pro    | Slavotinek A, Risolino M, Losa M, Cho MT, Monaghan KG, Schneidman-Duhovny D, et al. De novo, deleterious sequence variants that alter the transcriptional activity of the homeoprotein <i>PBX1</i> are associated with intellectual disability and pleiotropic developmental defects. <i>Hum Mol Genet</i> . 2017;26:4849-60.               |
| c.567del            | p.Arg190Glyfs* | Morichi S, Suzuki S, Kasuga A, Ishida Y, Yamanaka G, Kashiwagi Y, et al. A New Pathogenic Variant of <i>CAKUT1</i> Diagnosed Based on Intellectual Disability. <i>Indian J Pediatr</i> . 2020;87:480-1.                                                                                                                                     |
| c.626G>C            | p.Ser209Thr    | Takata A, Miyake N, Tsurusaki Y, Fukai R, Miyatake S, Koshimizu E, et al. Integrative Analyses of De Novo Mutations Provide Deeper Biological Insights into Autism Spectrum Disorder. <i>Cell Rep</i> . 2018;22:734-47.                                                                                                                     |

|          |             |                                                                                                                                                                                                                                                                                                                |
|----------|-------------|----------------------------------------------------------------------------------------------------------------------------------------------------------------------------------------------------------------------------------------------------------------------------------------------------------------|
| c.661G>T | p.Glu221*   | Riedhammer KM, Braunisch MC, Günthner R, Wagner M, Hemmer C, Strom TM, et al. Exome Sequencing and Identification of Phenocopies in Patients With Clinically Presumed Hereditary Nephropathies. Am J Kidney Dis. 2020;76:460-70.                                                                               |
| c.671T>A | p.Met224Lys | Slavotinek A, Risolino M, Losa M, Cho MT, Monaghan KG, Schneidman-Duhovny D, et al. De novo, deleterious sequence variants that alter the transcriptional activity of the homeoprotein PBX1 are associated with intellectual disability and pleiotropic developmental defects. Hum Mol Genet. 2017;26:4849-60. |
| c.680G>C | p.Arg227Pro | Slavotinek A, Risolino M, Losa M, Cho MT, Monaghan KG, Schneidman-Duhovny D, et al. De novo, deleterious sequence variants that alter the transcriptional activity of the homeoprotein PBX1 are associated with intellectual disability and pleiotropic developmental defects. Hum Mol Genet. 2017;26:4849-60. |
| c.701G>C | p.Arg234Pro | Slavotinek A, Risolino M, Losa M, Cho MT, Monaghan KG, Schneidman-Duhovny D, et al. De novo, deleterious sequence variants that alter the transcriptional activity of the homeoprotein PBX1 are associated with intellectual disability and pleiotropic developmental defects. Hum Mol Genet. 2017;26:4849-60. |
| c.700C>T | p.Arg234Trp | Kammoun M, Souche E, Brady P, Ding J, Cosemans N, Gratacos E, et al. Genetic profile of isolated congenital diaphragmatic hernia revealed by targeted next-generation sequencing. Prenat Diagn. 2018;38:654-63.                                                                                                |
| c.704G>A | p.Arg235Gln | Slavotinek A, Risolino M, Losa M, Cho MT, Monaghan KG, Schneidman-Duhovny D, et al. De novo, deleterious sequence variants that alter the transcriptional activity of the homeoprotein PBX1 are associated with intellectual disability and pleiotropic developmental defects. Hum Mol Genet. 2017;26:4849-60. |

|           |              |                                                                                                                                                                                                                                                                                                                        |
|-----------|--------------|------------------------------------------------------------------------------------------------------------------------------------------------------------------------------------------------------------------------------------------------------------------------------------------------------------------------|
| c.778T>C  | p.Tyr260His  | Deciphering Developmental Disorders Study. Prevalence and architecture of de novo mutations in developmental disorders. <i>Nature</i> . 2017;542(7642):433-8.                                                                                                                                                          |
| c.783dup  | p.Ser262Glu* | Slavotinek A, Risolino M, Losa M, Cho MT, Monaghan KG, Schneidman-Duhovny D, et al. De novo, deleterious sequence variants that alter the transcriptional activity of the homeoprotein PBX1 are associated with intellectual disability and pleiotropic developmental defects. <i>Hum Mol Genet</i> . 2017;26:4849-60. |
| c.836A>G  | p.Gln279Arg  | Bertoli-Avella AM, Beetz C, Ameziane N, Rocha ME, Guatibonza P, Pereira C, et al. Successful application of genome sequencing in a diagnostic setting: 1007 index cases from a clinically heterogeneous cohort. <i>Eur J Hum Genet</i> . 2021;29:141-53.                                                               |
| c.862C>T  | p.Arg288*    | Slavotinek A, Risolino M, Losa M, Cho MT, Monaghan KG, Schneidman-Duhovny D, et al. De novo, deleterious sequence variants that alter the transcriptional activity of the homeoprotein PBX1 are associated with intellectual disability and pleiotropic developmental defects. <i>Hum Mol Genet</i> . 2017;26:4849-60. |
| c.868C>T  | p.Arg290Trp  | Ruscitti F, Cerminara M, Iascone M, Pezzoli L, Rosti G, Romano F, et al. An example of parenchymal renal sparing in the context of complex malformations due to a novel mutation in the PBX1 gene. <i>Birth Defects Res</i> . 2022;114:674-81.                                                                         |
| c.1142C>T | p.Thr381Ile  | Li J, Wang L, Yu P, Shi L, Zhang K, Sun ZS, et al. Vitamin D-related genes are subjected to significant de novo mutation burdens in autism spectrum disorder. <i>Am J Med Genet B Neuropsychiatr Genet</i> . 2017;174:568-77.                                                                                          |
