# Supplementary material for: Missense variants in homeobox domain of PBX1 cause coracoclavicular ankylosis
Source: Research Square preprint supplement (doi:10.21203/rs.3.rs-5211072/v1), 2024-10-23
Supplement: Supplementary file 1 [file 370ba902e86fe2a053a14f4c.xlsx]

## Sheet: Sheet1
Table 1. Genetic and clinical features of the present patients and the previously reported cases with a missense variant in homeobox domain of PBX1
	Present study			Ruscitt et al. (2022)	Kammoun et al. (2018)	Slavotinek et al. 2017			Eozenou et al. (2019)	Bartolli-Avella et al. (2021)
	Patient 1	Patient 2	Patient 3			Patient 4	Patient 5	Patient 8
Variant (NM_002585.4)	c.844A>G	c.850T>A	c.869G>T	c.868C>T	c.700C>T	c.701G>C	c.704G>A	c.704G>C	c,704G>T	c.836A>G
Protein change (NP_002576.1)	p.Asn282Asp	p.Phe284Ile	p.Arg290Leu	p.Arg290Trp	p.Arg234Trp	p.Arg234Pro	p.Arg235Gln	p.Arg235Gln	p.Arg235Gln	p.Gln279Arg
Genome position (GRCh38:NC_000001.11)	g.164811996A>G	g.164812002T>A	g.164812021G>T	g.164812020C>T	g.164799888C>T	g.164799889G>C	g.164807544G>A	g.164807544G>C	g.164807544G>T	g.164807676A>G
CADD (v1.6)	27.6	26	31	29	25.2	34	33	31	31	32
REVEL	0.937	0.984	0.961	0.867	0.751	0.925	0.854	0.868	0.899	0.953
ACMG variant classification	PS1+PM1+PM2+PP3+PP4 Likely pathogenic	PS1+PM1+PM2+PP3+PP4 Likely pathogenic	PS2+PM1+PM2+PM5+PP3+PP4+P5 Pathogenic	PS2+PM1+PM2+PP3+PP4+PP5 Likely pathogenic	PS2+PM1+PM2+PP3+PP4 Likely pathogenic	PS2+PS3+PM1+PM2+PP3+PP4 Pathogenic	PS2+PS3+PM1+PM2+PP3+PP4 Pathogenic	PS2+PS3+PM1+PM2+PP3+PP4 Pathogenic	PS2+PS3+PM1+PM2+PP3+PP4 Pathogenic	PS2+PM1+PM2+PP3+PP4 Likely pathogenic
Sex	Male	Female	Female	Male	NA	Female	Male	Famale (46,XY)	Female (46,XY)	Male
Age at latest investigation	7	7	6	Day 4	NA	2	22 M	3 M	12.3	NA
Craniofacial characteristics
Eye abnormality	Ptosis	-	Choroid plexus cyst, glaucoma	-	NA	-	-	-	-	-
Cleft palate	-	-	Cleft soft palate	-	NA	-	-	-	-	-
Ear anomaly	Simple helices and scalloped tragus on the right	-	Prominent inferior crus of antihelix	Low-set posterior ly rotated ears	NA	-	Microtia with prominent lobules	-	-
Facial dysmorphisms	Sparse medial eyebrows, upturned nares, smooth philtrum	-	Mask-like face	Micrognathia	NA	-	Prominent nuchal folds, micrognathia	-	-	Dolicocephaly, narrow forehead, prominent nose, deeply set eye, highly arched eyebrow
Cardiopulmonary
	Meconium aspiration requiring ventilation	Respiratory failure	Pulmonary hypoplasia, peristent pulmonary hypertension of the newborn.	Pulmonary hypertension and total anomalous pulmonary venous return, and pulmonary dysmorphisms	NA	Perinatal asphyxia with chronic lung disease, pulmonary artery hypertension	Lung hypoplasia, paralyzed right diaphragm, persistent pulmonary hypertension	Respiratory insufficiency with hypercapnia	-	Atral septal defect, coarctation of aorta, neonatal respiratory distress, Recurrent upper respiratory tract infections, pulmonary artery stenosis
Patent ductus arteriosus (PDA)	+	+	+	+	NA	+	+	-	-	+
Laryngomalasia/tracheomalasia	+	+	+ (Severe)	NA	NA	-	NA	-	-	-
CAKUT
Renal hypoplasia/dysplasia	-	-	-	Double renal pelvis with double ureter on the right side	NA	- (Pyelocaliectasia +)	-	-	-
Genital anomaly	-	-	-	-	NA	-	-	46,XY gonadal dysgenesis	46,XY gonadal dysgenesis	Cryptorchidism
Skeletal
Coracoclavicular ankylosis	+	+	+	NA	NA	-	-	-	-	NA
Thick clavicles	+	+	+	Cleidosternal dysostosis	NA	-	-	-	-	NA
Premature ossification or absence of the ischiopubic synchonrosis	+	+	+	NA	NA	-	-	-	-	NA
Hip dislocation/subluxation	-	-	-	NA	NA	-	-	-	-	NA
Lumber lordosis	-	-	-	-	NA	-	-	-	-	NA
Spina bifida	-	-	-	NA	NA	-	-	-	-	NA
Rib abnormalities	-	-	-	NA	NA	-	-	-	-	NA
Other anomaly									Radiocubital synostosis	Barrel-shaped chest
Skin	-	-	Hypoplastic nipples	-	NA	-	-	-	-	-
Deafness	-	-	+	NA	NA	-	-	-	-	-
Neurodevelopment	Autism spectrum disorder, global developmental delay with walking at 2 years	Mild developmental delay	Severely delayed, walking at 5 years, autism spectrum disorder	NA	NA	Global developmental delay, walking with assistance at 2 years	-	-	-	Muscle hypotponia, hyperreflexia, delay gross motor development
Brain MRI	Normal	NA	Hypoplastic corpus callosum	-	NA	NA	NA	NA	NA	NA
Gastrointestinal	Gastroesophageal reflux	-	Gastrostomy due to feeding difficulty	Hepatomegaly, colonic duplication and malrotation of the appendix	NA	Gastrostomy due to gastrointestinal reflux	-	Difficulty with oral intake and requires tube feeding	NA	Achalasia, esophageal stenosis
Joint laxity	+	+	+	NA	NA	-	-	-	-	+
Other			Polyhydramnios	Polyhydramnios	Diaphragmatic hernia	Polyhydramnios		Polyhydramnios, inguinal hernia		NA
